# Supplementary material for: The Emergency Performance of the Hungarian Ambulance Service during the COVID-19 Pandemic
Source: MDPI journal article supplement (doi:10.3390/healthcare10112331), 2022-11-21
Supplement: s1 [file s1]

**Table S1.** Number and distribution of various non-COVID-19 related deliveries by the NAS between 2019 and 2021

|                                                 | 2019    |       | 2020    |       | 2021    |       | 2019/2020 | 2019/2021 | 2020/2021 |
|-------------------------------------------------|---------|-------|---------|-------|---------|-------|-----------|-----------|-----------|
|                                                 | N       | %     | N       | %     | N       | %     | p-value   | p-value   | p-value   |
| Acute myocardial infarction (ICD10: I21, I22)   |         |       |         |       |         |       |           |           |           |
| Gender                                          |         |       |         |       |         |       |           |           |           |
| male                                            | 1,787   | 56.4% | 2,024   | 56.9% | 2,030   | 57.4% | 0.531     | 0.553     | 0.600     |
| female                                          | 1,074   | 33.8% | 1,232   | 34.6% | 1,203   | 34.0% |           |           |           |
| missing                                         | 312     | 9.8%  | 302     | 8.5%  | 304     | 8.6%  |           |           |           |
| Age                                             |         |       |         |       |         |       |           |           |           |
| 15-64                                           | 1,611   | 50.8% | 1,767   | 49.7% | 1,798   | 50.9% | 0.366     | 0.968     | 0.332     |
| 65+                                             | 1,535   | 48.3% | 1,760   | 49.5% | 1,710   | 48.3% |           |           |           |
| missing                                         | 27      | 0.9%  | 31      | 0.8%  | 29      | 0.8%  |           |           |           |
| Haemorrhagic stroke (ICD10: I60, I61, I62)      |         |       |         |       |         |       |           |           |           |
| Gender                                          |         |       |         |       |         |       |           |           |           |
| male                                            | 155     | 42.7% | 110     | 45.7% | 98      | 44.4% | 0.537     | 0.744     | 0.801     |
| female                                          | 158     | 43.5% | 109     | 45.2% | 98      | 44.3% |           |           |           |
| missing                                         | 50      | 13.8% | 22      | 9.1%  | 25      | 11.3% |           |           |           |
| Age                                             |         |       |         |       |         |       |           |           |           |
| 15-64                                           | 196     | 54.0% | 111     | 46.1% | 119     | 53.8% | 0.045*    | 0.738     | 0.120     |
| 65+                                             | 159     | 43.8% | 126     | 52.3% | 101     | 45.7% |           |           |           |
| missing                                         | 8       | 2.2%  | 4       | 1.6%  | 1       | 0.5%  |           |           |           |
| Ischemic stroke (ICD10: I63, I64)               |         |       |         |       |         |       |           |           |           |
| Gender                                          |         |       |         |       |         |       |           |           |           |
| male                                            | 8,888   | 44.3% | 9,630   | 44.7% | 10,225  | 45.2% | 0.379     | 0.152     | 0.264     |
| female                                          | 9,221   | 45.9% | 9,811   | 45.6% | 10,423  | 46.1% |           |           |           |
| missing                                         | 1,961   | 9.8%  | 2,095   | 9.7%  | 1,971   | 8.7%  |           |           |           |
| Age                                             |         |       |         |       |         |       |           |           |           |
| 15-64                                           | 5,692   | 28.4% | 5,940   | 27.6% | 6,189   | 27.4% | 0.064     | 0.016*    | 0.581     |
| 65+                                             | 14,279  | 71.1% | 15,516  | 72.0% | 16,357  | 72.3% |           |           |           |
| missing                                         | 99      | 0.5%  | 80      | 0.4%  | 73      | 0.3%  |           |           |           |
| Stroke (ICD10: I60, I61, I62, I63, I64)         |         |       |         |       |         |       |           |           |           |
| Gender                                          |         |       |         |       |         |       |           |           |           |
| male                                            | 9,043   | 44.3% | 9,740   | 44.7% | 10,323  | 45.2% | 0.371     | 0.139     | 0.276     |
| female                                          | 9,379   | 45.9% | 9,920   | 45.6% | 10,521  | 46.1% |           |           |           |
| missing                                         | 2,011   | 9.8%  | 2,117   | 9.7%  | 1,996   | 8.7%  |           |           |           |
| Age                                             |         |       |         |       |         |       |           |           |           |
| 15-64                                           | 5,888   | 28.4% | 6,051   | 27.8% | 6,308   | 27.6% | 0.015*    | 0.004*    | 0.659     |
| 65+                                             | 14,438  | 71.1% | 15,642  | 71.8% | 16,458  | 72.1% |           |           |           |
| missing                                         | 107     | 0.5%  | 84      | 0.4%  | 74      | 0.3%  |           |           |           |
| Overall ambulance deliveries (without COVID-19) |         |       |         |       |         |       |           |           |           |
| Gender                                          |         |       |         |       |         |       |           |           |           |
| male                                            | 316,618 | 38.7% | 327,081 | 38.9% | 372,144 | 39.2% | 0.009*    | <0.001*   | <0.001*   |
| female                                          | 332,182 | 40.6% | 340,076 | 40.4% | 393,422 | 41.5% |           |           |           |
| missing                                         | 169,057 | 20.7% | 174,270 | 20.7% | 182,764 | 19.3% |           |           |           |
| Age                                             |         |       |         |       |         |       |           |           |           |
| 15-64                                           | 424,215 | 51.9% | 430,253 | 51.2% | 482,786 | 50.9% | <0.001*   | <0.001*   | <0.001*   |
| 65+                                             | 350,751 | 42.9% | 367,252 | 43.6% | 424,655 | 44.8% |           |           |           |
| missing                                         | 42,891  | 5.2%  | 43,922  | 5.2%  | 40,889  | 4.3%  |           |           |           |

\*Significant ( $p < 0.05$ ). Note: The years in this table show the data from 1<sup>st</sup> January to 31<sup>st</sup> December, not from week 1 to week 52.
